# Supplementary material for: Drug survival of biologic therapy in a large, disease‐based registry of patients with psoriasis: results from the Psoriasis Longitudinal Assessment and Registry (PSOLAR)
Source: PubMed Central journal article supplement — J Eur Acad Dermatol Venereol. 2016 Mar 30;30(7):1148–58. doi: 10.1111/jdv.13611 (PMC5071685; doi:10.1111/jdv.13611), 2016-03-30
Supplement: JDV-30-1148-s002.pdf [file JDV-30-1148-s002.pdf]

**Table S1.** Summary of new starts for first- through seventh-lines of therapy included in the current analyses; patients with psoriatic arthritis initiating new therapy during the registry

|                                 | <u>Ustekinumab</u> | <u>Infliximab</u> | <u>Adalimumab</u> | <u>Etanercept</u> | <u>Total</u> |
|---------------------------------|--------------------|-------------------|-------------------|-------------------|--------------|
| New Therapy Starts, N           | 240                | 73                | 152               | 74                | 539          |
| First-Line Therapy <sup>a</sup> | 41 (17.1)          | 20 (27.4)         | 33 (21.7)         | 25 (33.8)         | 119          |
| Second-Line Therapy             | 63 (26.3)          | 18 (24.7)         | 84 (55.3)         | 27 (36.5)         | 192          |
| Third-Line Therapy              | 82 (34.2)          | 19 (26.0)         | 22 (14.5)         | 18 (24.3)         | 141          |
| Fourth-Line Therapy             | 39 (16.3)          | 12 (16.4)         | 12 (7.9)          | 3 (4.1)           | 66           |
| Fifth-Line Therapy              | 10 (4.2)           | 2 (2.7)           | 1 (0.7)           | 1 (1.4)           | 14           |
| Sixth-Line Therapy              | 5 (2.1)            | 2 (2.7)           | 0                 | 0                 | 7            |
| Seventh-Line Therapy            | 0                  | 0                 | 0                 | 0                 | 0            |

Data are presented as number of patients (%).

<sup>a</sup>For both second- and third-lines of therapy beyond first-lines, the prior biologic may have been any of the four biologics included in these analyses or other biologics not approved for psoriasis (golimumab), those no longer available for treating psoriasis (efalizumab and alefacept), or those received via participation in a clinical study but not available for treatment of psoriasis (briakinumab).
