# Supplementary material for: Drug survival of biologic therapy in a large, disease‐based registry of patients with psoriasis: results from the Psoriasis Longitudinal Assessment and Registry (PSOLAR)
Source: PubMed Central journal article supplement — J Eur Acad Dermatol Venereol. 2016 Mar 30;30(7):1148–58. doi: 10.1111/jdv.13611 (PMC5071685; doi:10.1111/jdv.13611), 2016-03-30
Supplement: JDV-30-1148-s003.pdf [file JDV-30-1148-s003.pdf]

**Table S2.** Demographics and disease characteristics prior to first-line therapy; patients with psoriatic arthritis initiating new therapy during the registry

|                                                 | <u>Ustekinumab</u> | <u>Infliximab</u> | <u>Adalimumab</u> | <u>Etanercept</u> | <u>All</u>       |
|-------------------------------------------------|--------------------|-------------------|-------------------|-------------------|------------------|
| Patients Initiating First-Line Therapy          | 41                 | 20                | 33                | 25                | 119              |
| Age (years), N                                  | 41                 | 20                | 33                | 25                | 119              |
| Mean $\pm$ SD                                   | 53.2 $\pm$ 13.17   | 55.5 $\pm$ 13.00  | 48.9 $\pm$ 9.40   | 48.2 $\pm$ 12.31  | 51.4 $\pm$ 12.19 |
| Gender, N                                       | 41                 | 20                | 33                | 25                | 119              |
| Male                                            | 22 (53.7)          | 15 (75.0)         | 17 (51.5)         | 15 (60.0)         | 69 (58.0)        |
| Race, N                                         | 41                 | 20                | 33                | 25                | 119              |
| White                                           | 40 (97.6)          | 20 (100.0)        | 29 (87.9)         | 22 (88.0)         | 111 (93.3)       |
| BMI (kg/m <sup>2</sup> ), N                     | 41                 | 20                | 32                | 25                | 118              |
| Mean $\pm$ SD                                   | 32.4 $\pm$ 6.75    | 30.5 $\pm$ 5.34   | 31.1 $\pm$ 7.51   | 30.6 $\pm$ 9.27   | 31.3 $\pm$ 7.31  |
| Years since psoriasis diagnosis, N <sup>a</sup> | 41                 | 19                | 32                | 25                | 117              |
| Mean $\pm$ SD                                   | 20.4 $\pm$ 13.63   | 23.2 $\pm$ 13.53  | 14.9 $\pm$ 12.10  | 17.0 $\pm$ 13.66  | 18.6 $\pm$ 13.38 |
| Percent BSA, N                                  | 41                 | 20                | 33                | 24                | 118              |
| Mean $\pm$ SD                                   | 26.8 $\pm$ 24.46   | 30.3 $\pm$ 27.66  | 21.7 $\pm$ 22.58  | 20.7 $\pm$ 15.55  | 24.7 $\pm$ 22.98 |
| PGA Score, N                                    | 41                 | 18                | 32                | 24                | 115              |
| Mean $\pm$ SD                                   | 3.0 $\pm$ 1.26     | 2.7 $\pm$ 1.18    | 2.6 $\pm$ 1.05    | 2.6 $\pm$ 0.83    | 2.7 $\pm$ 1.11   |
| PGA 4/5                                         | 15 (36.6)          | 4 (22.2)          | 4 (12.5)          | 2 (8.3)           | 25 (21.8)        |
| Prior Therapy, N <sup>a</sup>                   | 41                 | 20                | 33                | 25                | 119              |
| Phototherapy                                    | 24 (58.5)          | 14 (70.0)         | 18 (54.5)         | 11 (44.0)         | 67 (56.3)        |
| Immunomodulators                                | 21 (51.2)          | 11 (55.0)         | 21 (63.6)         | 13 (52.0)         | 66 (55.5)        |
| Methotrexate                                    | 19 (46.3)          | 8 (40.0)          | 17 (51.5)         | 9 (36.0)          | 53 (44.5)        |
| Cyclosporine                                    | 7 (17.1)           | 4 (20.0)          | 8 (24.2)          | 5 (20.0)          | 24 (20.2)        |

Data are presented as number of patients (%), unless otherwise indicated.

BMI=body mass index, BSA= body surface area, PGA=Physician's Global Assessment, SD=standard deviation.

<sup>a</sup>Duration of psoriasis and prior therapies were collected at entry into the registry.
