# Supplementary material for: Drug survival of biologic therapy in a large, disease‐based registry of patients with psoriasis: results from the Psoriasis Longitudinal Assessment and Registry (PSOLAR)
Source: PubMed Central journal article supplement — J Eur Acad Dermatol Venereol. 2016 Mar 30;30(7):1148–58. doi: 10.1111/jdv.13611 (PMC5071685; doi:10.1111/jdv.13611), 2016-03-30
Supplement: JDV-30-1148-s004.pdf [file JDV-30-1148-s004.pdf]

**Table S3.** Most common maintenance doses and dose frequencies by treatment for first-, second-, and third-line therapies; doses in patients with psoriatic arthritis initiating new therapy during the registry

|                        | <u>Ustekinumab</u> | <u>Infliximab</u>          | <u>Adalimumab</u> | <u>Etanercept</u>   |
|------------------------|--------------------|----------------------------|-------------------|---------------------|
| First-Line Therapy, N  | 166                | 72                         | 117               | 105                 |
| Dose                   | 45 mg <sup>a</sup> | 5 mg/kg                    | 40 mg             | 50 ,mg              |
| Frequency              | Every 12 weeks     | Every 8 weeks <sup>b</sup> | Every other week  | Weekly <sup>c</sup> |
| n (%)                  | 68 (41.0)          | 42 (58.3)                  | 97 (82.9)         | 58 (55.2)           |
| Second-Line Therapy, N | 263                | 54                         | 205               | 78                  |
| Dose                   | 45 mg <sup>a</sup> | 5 mg/kg                    | 40 mg             | 50 mg               |
| Frequency              | Every 12 weeks     | Every 8 weeks <sup>b</sup> | Every other week  | Weekly <sup>c</sup> |
| n (%)                  | 122 (46.4)         | 22 (40.7)                  | 163 (79.5)        | 41 (52.6)           |
| Third-Line Therapy, N  | 299                | 68                         | 47                | 34                  |
| Dose                   | 45 mg <sup>a</sup> | 5 mg/kg                    | 40 mg             | 50 mg               |
| Frequency              | Every 12 weeks     | Every 8 weeks <sup>b</sup> | Every other week  | Weekly <sup>c</sup> |
| n (%)                  | 125 (41.8)         | 35 (51.5)                  | 32 (68.1)         | 23 (67.6)           |

Data are reported as number of doses administered (%). N=total number of administrations for each line of therapy

<sup>a</sup>Additionally, a large proportion of 90-mg doses of ustekinumab every 12 weeks were administered, including 63/166 (38.0%) during first-line therapy, 75/263 (28.5) during second-line therapy, and 99/299 (33.1%) during third-line therapy.

<sup>b</sup>Infliximab 5 mg/kg was administered every 6 weeks (3/72 [4.2%]) and at “other” dosing intervals (11/72 [15.3%]) during first-line therapy; corresponding frequencies were 8/54 (14.8%) and 12/54 (22.2%) during second-line therapy and 5/68 (7.4%) and 12/68 (17.6%) during third-line therapy.

<sup>c</sup>A large proportion of etanercept 50-mg doses were administered twice weekly during first-line therapy (42/105 [40.0%]), during second-line therapy (31/78 [39.7%]) and during third-line therapy (8/34 [23.5%]).
