# Supplementary material for: Drug survival of biologic therapy in a large, disease‐based registry of patients with psoriasis: results from the Psoriasis Longitudinal Assessment and Registry (PSOLAR)
Source: PubMed Central journal article supplement — J Eur Acad Dermatol Venereol. 2016 Mar 30;30(7):1148–58. doi: 10.1111/jdv.13611 (PMC5071685; doi:10.1111/jdv.13611), 2016-03-30
Supplement: JDV-30-1148-s005.pdf [file JDV-30-1148-s005.pdf]

**Table S4.** Median duration of registry follow-up until stop/switch for first-line, second-line, and third-line treatments; patients with psoriatic arthritis initiating new therapy during the registry

|                               | <u>Ustekinumab</u> | <u>Infliximab</u> | <u>Adalimumab</u> | <u>Etanercept</u> | <u>All</u> |
|-------------------------------|--------------------|-------------------|-------------------|-------------------|------------|
| First-line therapy starts, N  | 41                 | 20                | 33                | 25                | 119        |
| Median, Years                 | 1.87               | 1.39              | 2.22              | 2.69              | 2.22       |
| Second-line therapy starts, N | 63                 | 18                | 84                | 27                | 192        |
| Median, Years                 | 2.62               | 3.14              | 2.61              | 2.52              | 2.73       |
| Third-line therapy starts, N  | 82                 | 19                | 22                | 18                | 141        |
| Median, Years                 | 2.98               | 2.89              | 2.92              | 3.19              | 3.00       |
