# Supplementary material for: Drug survival of biologic therapy in a large, disease‐based registry of patients with psoriasis: results from the Psoriasis Longitudinal Assessment and Registry (PSOLAR)
Source: PubMed Central journal article supplement — J Eur Acad Dermatol Venereol. 2016 Mar 30;30(7):1148–58. doi: 10.1111/jdv.13611 (PMC5071685; doi:10.1111/jdv.13611), 2016-03-30
Supplement: JDV-30-1148-s006.pdf [file JDV-30-1148-s006.pdf]

**Table S5.** Summary of median days on first-, second-, and third-line therapy; patients with psoriatic arthritis who initiated and discontinued new therapy during the registry

|                     | <u>Ustekinumab</u> | <u>Infliximab</u> | <u>Adalimumab</u> | <u>Etanercept</u> |
|---------------------|--------------------|-------------------|-------------------|-------------------|
| Patients with PsA   | 186                | 87                | 139               | 48                |
| First-Line Therapy  |                    |                   |                   |                   |
| All Patients, N     | 41                 | 20                | 33                | 25                |
| Days on Therapy     | 598 (435 - 887)    | 402 (256 - 948)   | 698 (393 - 845)   | 794 (246 - 1032)  |
| Discontinued, N     | 7                  | 3                 | 6                 | 7                 |
| Days on therapy     | 361 (198 - 600)    | 176 (99 - 423)    | 299 (69 - 400)    | 193 (131 - 246)   |
| Second-Line Therapy |                    |                   |                   |                   |
| All Patients, N     | 63                 | 18                | 84                | 27                |
| Days on Therapy     | 677 (316 - 893)    | 390 (153 - 616)   | 403 (148 - 646)   | 443 (168 - 823)   |
| Discontinued, N     | 13                 | 8                 | 28                | 10                |
| Days on Therapy     | 200 (158 - 308)    | 177 (119 - 414)   | 143 (89 - 345)    | 262 (77 - 343)    |
| Third-Line Therapy  |                    |                   |                   |                   |
| All Patients, N     | 82                 | 19                | 22                | 18                |
| Days on Therapy     | 581 (358 - 963)    | 392 (264 - 595)   | 302 (90 - 553)    | 145 (50 - 501)    |
| Discontinued, N     | 20                 | 6                 | 8                 | 9                 |
| Days on Therapy     | 237 (168 - 483)    | 261 (158 - 595)   | 65 (29 - 133)     | 50 (17 - 113)     |

Days on therapy are presented as median (interquartile range). PsA, psoriatic arthritis.
