# Supplementary material for: Drug survival of biologic therapy in a large, disease‐based registry of patients with psoriasis: results from the Psoriasis Longitudinal Assessment and Registry (PSOLAR)
Source: PubMed Central journal article supplement — J Eur Acad Dermatol Venereol. 2016 Mar 30;30(7):1148–58. doi: 10.1111/jdv.13611 (PMC5071685; doi:10.1111/jdv.13611), 2016-03-30
Supplement: JDV-30-1148-s007.pdf [file JDV-30-1148-s007.pdf]

**Table S6.** Proportion of patients who discontinued and reasons for discontinuation of first-, second-, and third-line therapy; patients with psoriatic arthritis initiating new therapy during the registry

|                               | <u>Ustekinumab</u> | <u>Infliximab</u> | <u>Adalimumab</u> | <u>Etanercept</u> |
|-------------------------------|--------------------|-------------------|-------------------|-------------------|
| First-Line Therapy, N         | 41                 | 20                | 33                | 25                |
| Number (%) Discontinued       | 7 (17.1)           | 3 (15.0)          | 6 (18.2)          | 7 (28.0)          |
| Reason for Discontinuation, n |                    |                   |                   |                   |
| Lack of Effectiveness         | 5                  | 3                 | 4                 | 3                 |
| Patient Choice                | 1                  | -                 | -                 | 1                 |
| Insurance/Reimbursement       | -                  | -                 | 2                 | 2                 |
| Other                         | 1                  | -                 | 1                 | -                 |
| Adverse Event                 | -                  | 1                 | -                 | 1                 |
| Second-Line Therapy, N        | 63                 | 18                | 84                | 27                |
| Number (%) Discontinued       | 13 (20.6)          | 8 (44.4)          | 28 (33.3)         | 10 (37.0)         |
| Reason for Discontinuation, n |                    |                   |                   |                   |
| Lack of Effectiveness         | 7                  | 3                 | 13                | 5                 |
| Other                         | 3                  | -                 | 2                 | 1                 |
| Patient Choice                | 1                  | -                 | 4                 | 1                 |
| Insurance/Reimbursement       | 1                  | 1                 | 3                 | 2                 |
| Adverse Event                 | -                  | 2                 | 4                 | 2                 |
| Third-Line Therapy, N         | 82                 | 19                | 22                | 18                |
| Number (%) Discontinued       | 20 (24.4)          | 6 (31.6)          | 8 (36.4)          | 9 (50.0)          |
| Reason for Discontinuation, n |                    |                   |                   |                   |
| Lack of Effectiveness         | 10                 | 3                 | 4                 | 6                 |
| Patient Choice                | 3                  | 1                 | -                 | -                 |
| Other                         | 3                  | -                 | 1                 | 1                 |
| Insurance/Reimbursement       | 3                  | -                 | -                 | -                 |
| Adverse Event                 | 2                  | 1                 | 2                 | 2                 |
