# Supplementary material for: Drug survival of biologic therapy in a large, disease‐based registry of patients with psoriasis: results from the Psoriasis Longitudinal Assessment and Registry (PSOLAR)
Source: PubMed Central journal article supplement — J Eur Acad Dermatol Venereol. 2016 Mar 30;30(7):1148–58. doi: 10.1111/jdv.13611 (PMC5071685; doi:10.1111/jdv.13611), 2016-03-30
Supplement: JDV-30-1148-s008.pdf [file JDV-30-1148-s008.pdf]

**Table S7.** Cox hazard regression analysis: treatment effects and other factors significantly affecting time to discontinuation of biologic therapy; patients with psoriatic arthritis initiating new therapy during the registry

|                                                    | First-line therapy |               |                       |                          | Second-line therapy |                |                       |                          | Third-line therapy |               |                       |                          |
|----------------------------------------------------|--------------------|---------------|-----------------------|--------------------------|---------------------|----------------|-----------------------|--------------------------|--------------------|---------------|-----------------------|--------------------------|
|                                                    | Hazard ratio       | 95% CI        | p- value <sup>a</sup> | Missing patients (N=119) | Hazard ratio        | 95% CI         | p- value <sup>a</sup> | Missing patients (N=192) | Hazard ratio       | 95% CI        | p- value <sup>a</sup> | Missing patients (N=141) |
| Infliximab vs ustekinumab                          | 0.709              | 0.128, 3.923  | 0.6936                | 0                        | 7.639               | 2.650, 22.024  | 0.0002                | 0                        | 1.602              | 0.469, 5.472  | 0.4519                | 0                        |
| Adalimumab vs ustekinumab                          | 1.782              | 0.503, 6.318  | 0.3710                | 0                        | 4.170               | 1.708, 10.185  | 0.0017                | 0                        | 1.809              | 0.606, 5.398  | 0.2878                | 0                        |
| Etanercept vs ustekinumab                          | 2.563              | 0.735, 8.941  | 0.1399                | 0                        | 3.452               | 1.323, 9.003   | 0.0113                | 0                        | 3.751              | 1.291, 10.894 | 0.0151                | 0                        |
| Prior immunomodulator use (Yes vs No)              | 0.710              | 0.242, 2.081  | 0.5322                | 1                        | 1.527               | 0.775, 3.012   | 0.2213                | 0                        | 1.086              | 0.393, 3.002  | 0.8733                | 0                        |
| Concomitant methotrexate (Yes vs No)               | 0.549              | 0.172, 1.754  | 0.3116                | 0                        | 1.561               | 0.786, 3.099   | 0.2030                | 0                        | 0.922              | 0.414, 2.057  | 0.8434                | 0                        |
| Prior TNF- $\alpha$ inhibitor vs prior ustekinumab | NA                 | NA            | NA                    | NA                       | 5.411               | 0.662, 44.214  | 0.1152                | 0                        | 0.604              | 0.219, 1.666  | 0.3299                | 0                        |
| Prior other treatment vs prior ustekinumab         | NA                 | NA            | NA                    | NA                       | 10.181              | 1.000, 103.614 | 0.0500                | 0                        | 1.034              | 0.123, 8.694  | 0.9754                | 0                        |
| Male vs Female                                     | 2.120              | 0.765, 5.879  | 0.1486                | 0                        | 0.884               | 0.475, 1.646   | 0.6972                | 0                        | 0.561              | 0.274, 1.149  | 0.1140                | 0                        |
| Age at PsO diagnosis /10 years <sup>b</sup>        | 0.690              | 0.441, 1.079  | 0.1036                | 23                       | 1.043               | 0.815, 1.334   | 0.7403                | 32                       | 0.801              | 0.576, 1.115  | 0.1887                | 30                       |
| Age at biologic start /10 years <sup>b</sup>       | 1.881              | 1.055, 3.352  | 0.0322                | 0                        | 0.931               | 0.689, 1.256   | 0.6381                | 0                        | 1.258              | 0.844, 1.875  | 0.2591                | 0                        |
| Non-white vs White                                 | 2.986              | 0.431, 20.666 | 0.2678                | 0                        | 2.216               | 0.932, 5.269   | 0.0717                | 0                        | 1.860              | 0.707, 4.896  | 0.2088                | 0                        |

|                                                             |       |                  |        |    |        |                  |        |   |       |                  |        |   |
|-------------------------------------------------------------|-------|------------------|--------|----|--------|------------------|--------|---|-------|------------------|--------|---|
| Overweight/obesity class I<br>(25≤BMI<35 vs <25)            | 0.599 | 0.138,<br>2.609  | 0.4951 | 2  | 1.753  | 0.645,<br>4.765  | 0.2713 | 2 | 1.026 | 0.326,<br>3.231  | 0.9651 | 2 |
| Obesity class II/III<br>(BMI≥ 35 vs <25)                    | 1.232 | 0.258,<br>5.885  | 0.7938 | 2  | 1.422  | 0.473,<br>4.279  | 0.5306 | 2 | 1.003 | 0.285,<br>3.533  | 0.9967 | 2 |
| Alcohol (current/past<br>vs never)                          | 0.627 | 0.214,<br>1.832  | 0.3932 | 0  | 1.025  | 0.444,<br>2.364  | 0.9544 | 1 | 0.568 | 0.232,<br>1.391  | 0.2160 | 0 |
| Smoking (current/past<br>vs never)                          | 1.372 | 0.529,<br>3.560  | 0.5151 | 0  | 0.713  | 0.386,<br>1.320  | 0.2818 | 0 | 1.020 | 0.496,<br>2.097  | 0.9580 | 0 |
| Family history of PsO<br>vs no history of PsO               | 0.646 | 0.232,<br>1.797  | 0.4022 | 0  | 1.331  | 0.741,<br>2.393  | 0.3385 | 0 | 0.869 | 0.394,<br>1.919  | 0.7288 | 0 |
| Baseline PGA 2,3 vs 0,1                                     | 0.704 | 0.138,<br>3.589  | 0.6732 | 3  | 1.303  | 0.596,<br>2.850  | 0.5070 | 5 | 1.322 | 0.474,<br>3.688  | 0.5944 | 2 |
| Baseline PGA 4,5 vs 0,1                                     | 0.680 | 0.101,<br>4.578  | 0.6919 | 3  | 0.738  | 0.257,<br>2.114  | 0.5710 | 5 | 1.665 | 0.500,<br>5.547  | 0.4065 | 2 |
| PsA vs no PsA                                               | NA    | NA               | NA     | 0  | NA     | NA               | NA     | 0 | NA    | NA               | NA     | 0 |
| Europe <sup>c</sup> vs North America <sup>d</sup>           | 3.624 | 0.545,<br>24.079 | 0.1827 | 0  | 0.999  | 0.378,<br>2.638  | 0.9985 | 0 | 0.138 | 0.015,<br>1.281  | 0.0814 | 0 |
| Latin America <sup>e</sup> vs<br>North America <sup>d</sup> | NA    | NA               | NA     | 0  | 16.186 | 3.016,<br>86.868 | 0.0012 | 0 | 0.772 | 0.116,<br>5.140  | 0.7895 | 0 |
| Disc: efficacy vs insurance                                 | NA    | NA               | NA     | NA | 0.997  | 0.342,<br>2.905  | 0.9959 | 0 | 1.271 | 0.193,<br>8.371  | 0.8032 | 0 |
| Disc: adverse event<br>vs insurance                         | NA    | NA               | NA     | NA | 1.274  | 0.325,<br>5.000  | 0.7283 | 0 | 1.942 | 0.217,<br>17.352 | 0.5526 | 0 |
| Disc: patient choice<br>vs insurance                        | NA    | NA               | NA     | NA | 0.874  | 0.260,<br>2.936  | 0.8280 | 0 | 0.820 | 0.138,<br>4.865  | 0.8275 | 0 |
| Disc: reason unknown vs<br>due to insurance                 | NA    | NA               | NA     | NA | 7.187  | 1.989,<br>25.969 | 0.0026 | 0 | 6.950 | 0.943,<br>51.213 | 0.0571 | 0 |
| Disc: other reason <sup>f</sup> vs<br>insurance             | NA    | NA               | NA     | NA | 2.881  | 0.697,<br>11.910 | 0.1439 | 0 | 1.022 | 0.126,<br>8.318  | 0.9836 | 0 |
| Ins: Gov/Public vs None                                     | 0.452 | 0.056,<br>3.668  | 0.4572 | 0  | 1.896  | 0.323,<br>11.110 | 0.4784 | 0 | 0.221 | 0.030,<br>1.618  | 0.1373 | 0 |

|                                   |       |                  |        |   |       |                 |        |   |       |                 |        |   |
|-----------------------------------|-------|------------------|--------|---|-------|-----------------|--------|---|-------|-----------------|--------|---|
| Ins: Private vs None              | 3.770 | 0.628,<br>22.644 | 0.1469 | 0 | 1.114 | 0.211,<br>5.871 | 0.8988 | 0 | 0.711 | 0.109,<br>4.625 | 0.7213 | 0 |
| Ins: Gov/Public & Private vs None | 3.153 | 0.245,<br>40.574 | 0.3783 | 0 | 1.110 | 0.144,<br>8.584 | 0.9204 | 0 | 0.224 | 0.013,<br>3.859 | 0.3032 | 0 |

BMI=body mass index; CI=confidence interval; Disc=discontinuation; Gov=government; Ins=insurance; NA=not applicable, PGA=Physician's Global Assessment; PsA-psoriatic arthritis; PsO=psoriasis; TNF=tumor necrosis factor.

<sup>a</sup>p-value derived from Wald Chi-square test.

<sup>b</sup>Results presented here represent the imputed model. When the non-imputed model was calculated, results differed due to the large number of missing patients for age at diagnosis. When the non-imputed model was re-run without this factor, the results without imputation were consistent with the imputed data reported here.

<sup>c</sup>Europe includes Austria, Belgium, Czech Republic, Greece, The Netherlands, Portugal, Slovakia, Slovenia, Ukraine, and Israel.

<sup>d</sup>North America includes the United States and Canada.

<sup>e</sup>Latin America includes Chile, Columbia, Argentina, and Mexico.

<sup>f</sup>Other reasons for discontinuation (e.g., adverse events, lack of effectiveness, patient choice) were associated with time to stop/switch.
