# Supplementary figures and images for: Drug survival of biologic therapy in a large, disease‐based registry of patients with psoriasis: results from the Psoriasis Longitudinal Assessment and Registry (PSOLAR)
Source: PubMed Central journal article supplement — J Eur Acad Dermatol Venereol. 2016 Mar 30;30(7):1148–58. doi: 10.1111/jdv.13611 (PMC5071685; doi:10.1111/jdv.13611), 2016-03-30

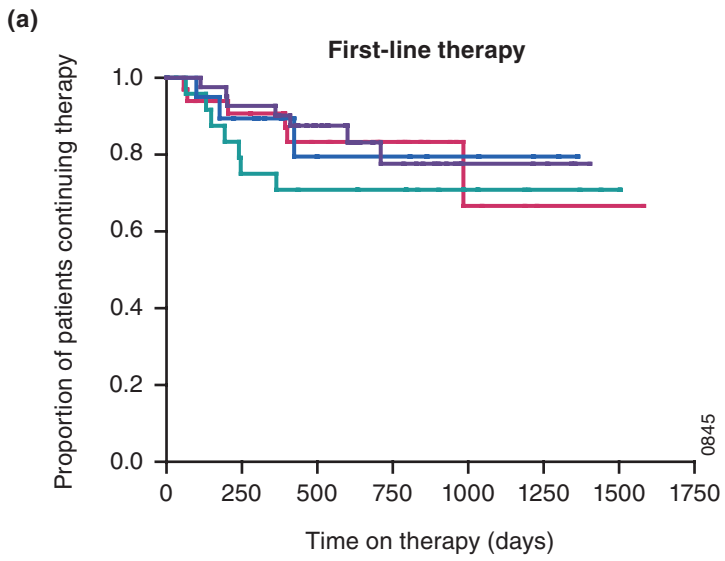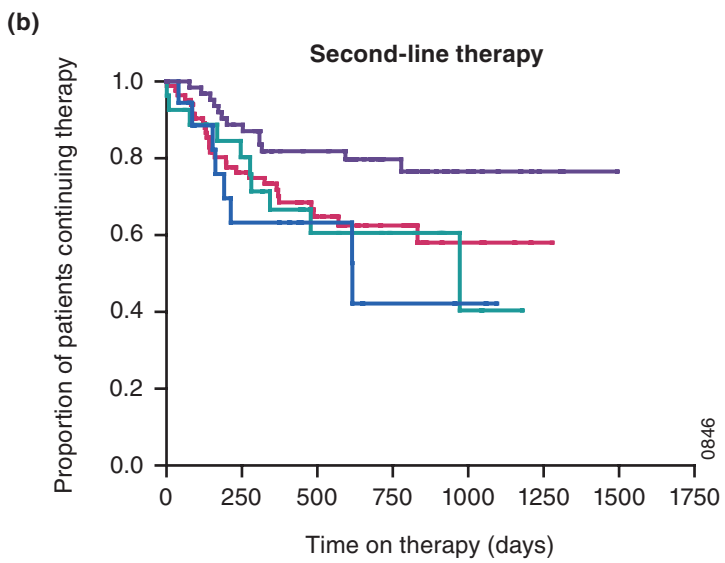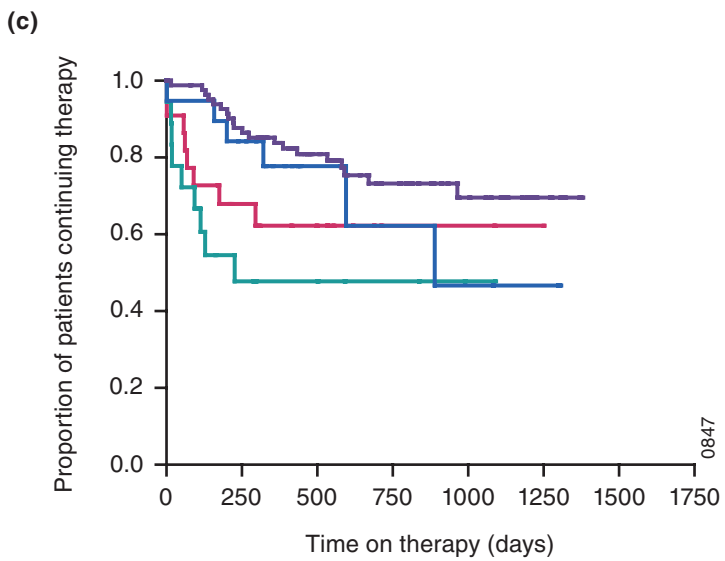

— Ustekinumab   
 — Infliximab   
 — Adalimumab   
 — Etanercept

Supplement: JDV-30-1148-s001.pdf [file JDV-30-1148-s001.pdf]
